# Supplementary material for: Contact toxicity, Electrophysiology, Anti-mating and Repellent effects of Piper guineense against Spodoptera frugiperda
Source: Research Square preprint supplement (doi:10.21203/rs.3.rs-6443423/v1), 2025-04-28
Supplement: Supplementary file 1 [file c2477b60bdcf7b6bb0267891.docx]

# Contact toxicity, Electrophysiology, Anti-mating and Repellent effects of *Piper guineense* against Spodoptera frugiperda

Mobolade Dele Akinbuluma1,2 ,Jacques A. Deere1, Peter Roessingh1 and Astrid T. Groot1

1. Department of Evolutionary and Population Biology, Institute for Biodiversity and Ecosystem Dynamics, Amsterdam, Netherlands
2. Department of Crop Protection & Environmental Biology, University of Ibadan, Ibadan, Nigeria

Corresponding author: Email: [m.d.akinbuluma@uva.nl;](mailto:m.d.akinbuluma@uva.nl;) Phone: +31686279835

ORCID: https://orcid.org/0000-0002-5473-9703

**Supplementary Information**

Table S1a. Statistical comparison of LC50 values of *Piper guineense* extract on Spodoptera frugiperda larvae tested by topical application between days

| Comparison  across days | Estimate | Std. Error | t-value | p-value |
| --- | --- | --- | --- | --- |
| 1-2 | 3.69989 | 9.8652 | 0.3750 | 0.7109 |
| 1-7 | 3.88432 | 9.8759 | 0.3933 | 0.6976 |
| 2-7 | 0.18443 | 0.9821 | 0.1878 | 0.8526 |

LC50 values were not significantly different (p > 0.05) across pairs of days.

Table S1b.  LC50 values of *Piper guineense* extract across days against Spodoptera frugiperda larvae tested by topical application

| Time (Days) | LC50 | 95% CI |
| --- | --- | --- |
| 1 | 3.46 | -15.22-25.43 |
| 2 | 0.86 | 0.14- 2.67 |
| 7 | 0.36 | -0.36- 2.80 |

LC50 values were not significantly different (p > 0.05) due to overlapping respective 95% CI. LC50 = median lethal concentration; CI = confidence interval.


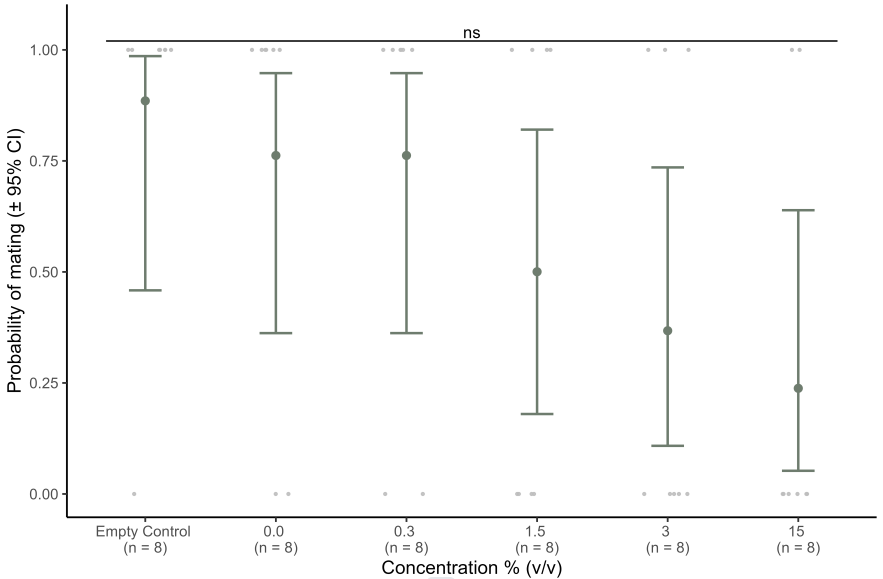


Fig S1: Probability of mating of *Spodoptera frugiperda* exposed to extract concentrations of *Piper guineense* extract. ns = mating probability not significant (p > 0.05). Grey dots indicate raw data.

Table S2. Contrast effects of extract concentration and population on oviposition. Contrasts are Tukey p-value adjustments after a significant interaction between population and extract concentration was found (GLMM: estimate = -2.43±0.83se, z-value. = -2.93, p = 0.003). Values are given on a log scale as the initial model was fitted with a Poisson distribution.

| **Contrast** | **estimate** | **s.e** | **z-ratio** | **p-value** |
| --- | --- | --- | --- | --- |
| *SFK population* |  |  |  |  |
| Empty Control - 0.0% | 0.41 | 0.41 | 0.99 | 1.00 |
| Empty Control - 0.3% | 2.01 | 0.75 | 2.68 | 0.24 |
| Empty Control - 1.5% | 0.31 | 0.40 | 0.78 | 1.00 |
| Empty Control - 3% | 1.10 | 0.52 | 2.13 | 0.60 |
| Empty Control - 15% | 1.32 | 0.53 | 2.35 | 0.44 |
| 0.0% - 0.3% | 1.61 | 0.77 | 2.08 | 0.64 |
| 0.0% - 1.5% | -0.09 | 0.44 | -0.22 | 1.00 |
| 0.0% - 3% | 0.69 | 0.55 | 1.27 | 0.98 |
| 0.0% - 15% | 0.92 | 0.59 | 1.55 | 0.93 |
| 0.3% -1.5% | -1.70 | 0.77 | -2.22 | 0.53 |
| 0.3% - 3% | -0.92 | 0.84 | -1.10 | 0.99 |
| 0.3% -15% | -0.69 | 0.87 | -0.80 | 1.00 |
| 1.5% - 3% | 0.79 | 0.54 | 1.46 | 0.95 |
| 1.5% - 15% | 1.01 | 0.58 | 1.74 | 0.85 |
| 3% - 15% | 0.22 | 0.67 | 0.33 | 1.00 |
|  |  |  |  |  |
| *SFN population* |  |  |  |  |
| Empty Control - 0.0% | 0.66 | 0.31 | 2.15 | 0.59 |
| Empty Control - 0.3% | 3.43 | 1.02 | 3.38 | **0.03** |
| Empty Control - 1.5% | 2.74 | 0.73 | 3.76 | **0.009** |
| Empty Control - 3% | 1.04 | 0.35 | 2.96 | 0.12 |
| Empty Control - 15% | 2.34 | 0.60 | 3.87 | **0.006** |
| 0.0% - 0.3% | 2.77 | 1.03 | 2.69 | 0.23 |
| 0.0% - 1.5% | 2.08 | 0.75 | 2.78 | 0.19 |
| 0.0% - 3% | 0.37 | 0.39 | 0.96 | 0.99 |
| 0.0% - 15% | 1.67 | 0.63 | 2.66 | 0.24 |
| 0.3% -1.5% | -0.69 | 1.22 | -0.57 | 1.00 |
| 0.3% - 3% | -2.40 | 1.04 | -2.30 | 0.48 |
| 0.3% -15% | -1.10 | 1.15 | -0.95 | 1.00 |
| 1.5% - 3% | -1.70 | 0.77 | -2.22 | 0.53 |
| 1.5% - 15% | -0.41 | 0.91 | -0.45 | 1.00 |
| 3% - 15% | 1.30 | 0.65 | 2.00 | 0.70 |
|  |  |  |  |  |


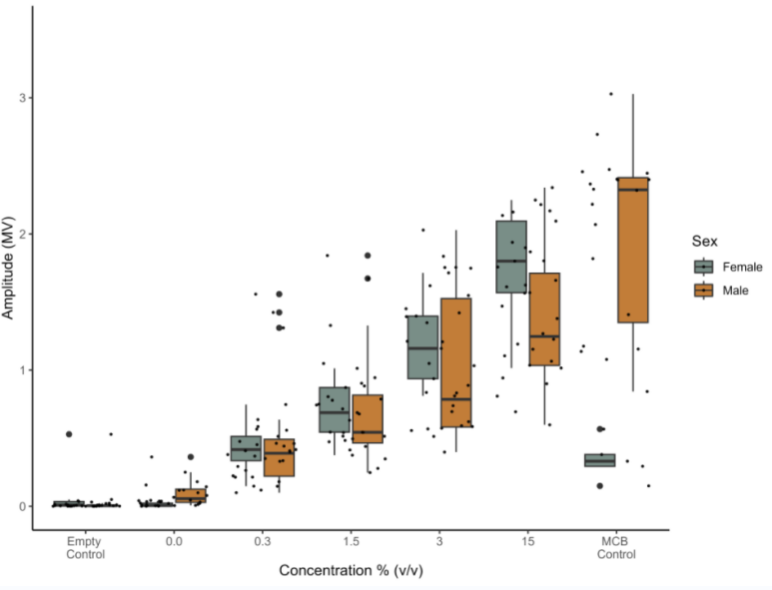


**Fig S2:** EAG responses of *Spodoptera frugiperda* males and female for combined SFK and SFK populations to extract concentration of *Piper guineense*. Box and whisker plots indicate amplitude response (in millivolts (MV)) of females (light grey) and males (orange). Extract concentrations of *P. guineense* are in percentage volume to volume (% (v/v)). The empty control represents negative control and the MCB (multiple component blends of the five pheromone compounds from a *S. frugiperda* female) represents a positive control. Sample sizes per sex: Female – Empty control and all concentrations (0.0% (v/v) - 15% (v/v)) = 13, MCB control = 5; Male – Empty control, all concentrations and MCB control = 18). Black dots indicate raw data.
